# Supplementary material for: Na11Ta8P7O43: (Ta8O33) bi-capped triangular prisms connected by PO4 groups resulting in a phase-matched second harmonic response
Source: Royal Society of Chemistry journal article supplement (doi:10.1039/d3dt02207b), 2023-01-01
Supplement: d3dt02207b1.pdf [file d3dt02207b1.pdf]

# **Na<sub>11</sub>Ta<sub>8</sub>P<sub>7</sub>O<sub>43</sub>: (Ta<sub>8</sub>O<sub>33</sub>) bi-capped triangular prisms connected by PO<sub>4</sub> groups resulting in phase-matched second harmonic response**

Ziyan Lv<sup>a, b</sup>, Rukang Li<sup>a, b\*</sup>

<sup>a</sup> Beijing Center for Crystal Research and Development, Key Laboratory of functional Crystals and Laser Technology, Technical Institute of Physics and Chemistry, Chinese Academy of Sciences, Beijing 100190, China

<sup>b</sup> Center of Materials Science and Optoelectronics Engineering, University of Chinese Academy of Sciences. Beijing 100049, China

\*Email: rkli@mail.ipc.ac.cn.

## CONTENTS

Figure S1. Le Bail fitting of the powder Na<sub>11</sub>Ta<sub>8</sub>P<sub>7</sub>O<sub>43</sub>.

Figure S2. TG and DSC curve of Na<sub>11</sub>Ta<sub>8</sub>P<sub>7</sub>O<sub>43</sub>.

Figure S3. X-ray diffraction patterns of Na<sub>11</sub>Ta<sub>8</sub>P<sub>7</sub>O<sub>43</sub>.

Figure S4. Crystal structure of BBO and NTPO.

Figure S5. Calculated electronic band structure (a) and density of states (DOS) (b) of Na<sub>11</sub>Ta<sub>8</sub>P<sub>7</sub>O<sub>43</sub>.

Table S1. Fractional atomic coordinates and equivalent isotropic displacement parameters (Å<sup>2</sup>) for the compound Na<sub>11</sub>Ta<sub>8</sub>P<sub>7</sub>O<sub>43</sub>.

Table S2. Anisotropic displacement parameters (Å<sup>2</sup>) for the compound Na<sub>11</sub>Ta<sub>8</sub>P<sub>7</sub>O<sub>43</sub>.

Table S3. Selected bond lengths (Å) for the compound Na<sub>11</sub>Ta<sub>8</sub>P<sub>7</sub>O<sub>43</sub>.

Appendix. The original calculation results.

Figure S1. Le Bail fitting of the powder  $\text{Na}_{11}\text{Ta}_8\text{P}_7\text{O}_{43}$ .

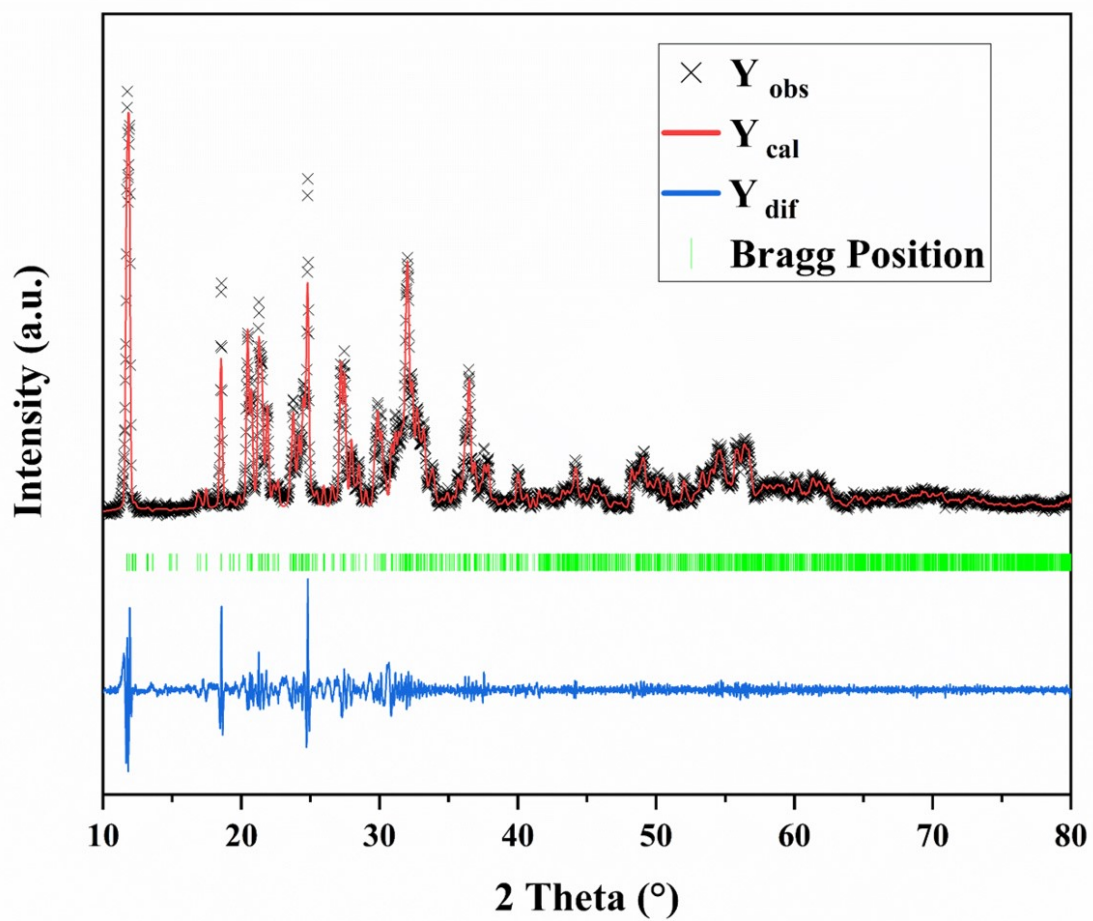

Figure S2. TG and DSC curve of  $\text{Na}_{11}\text{Ta}_8\text{P}_7\text{O}_{43}$ .

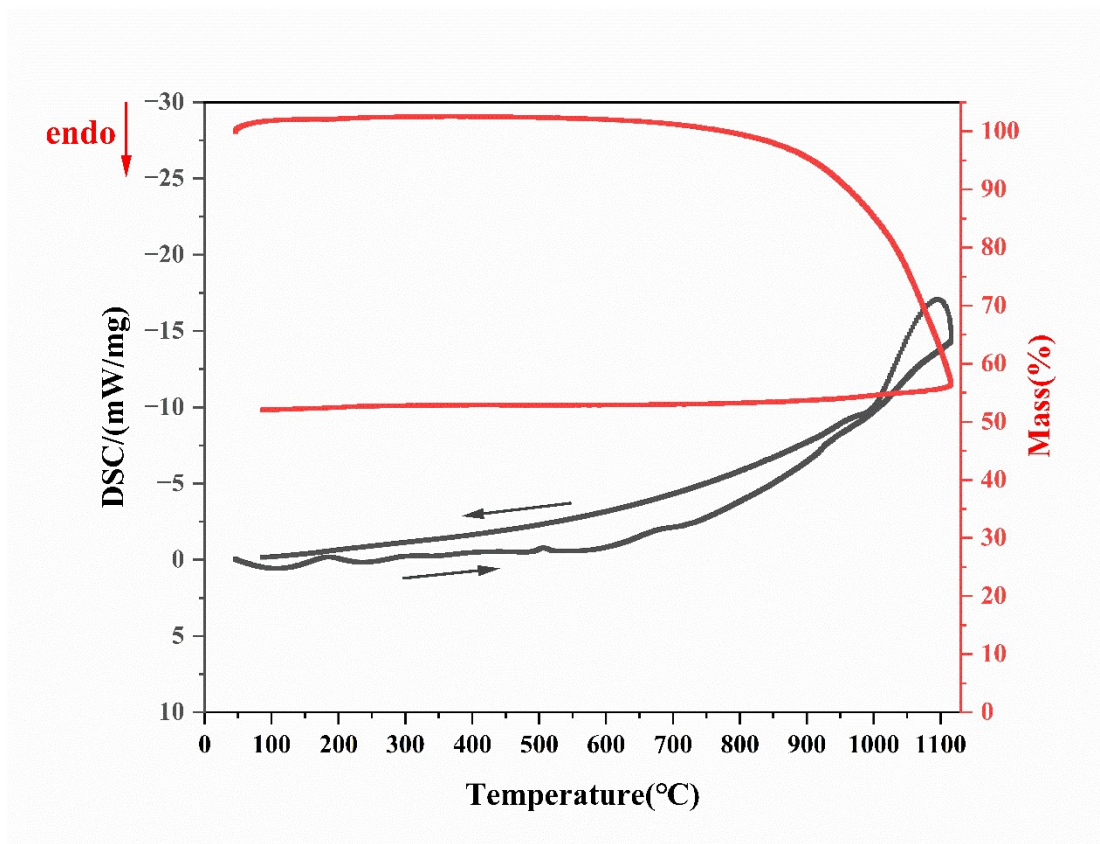

Figure S3. X-ray diffraction patterns of  $\text{Na}_{11}\text{Ta}_8\text{P}_7\text{O}_{43}$ .

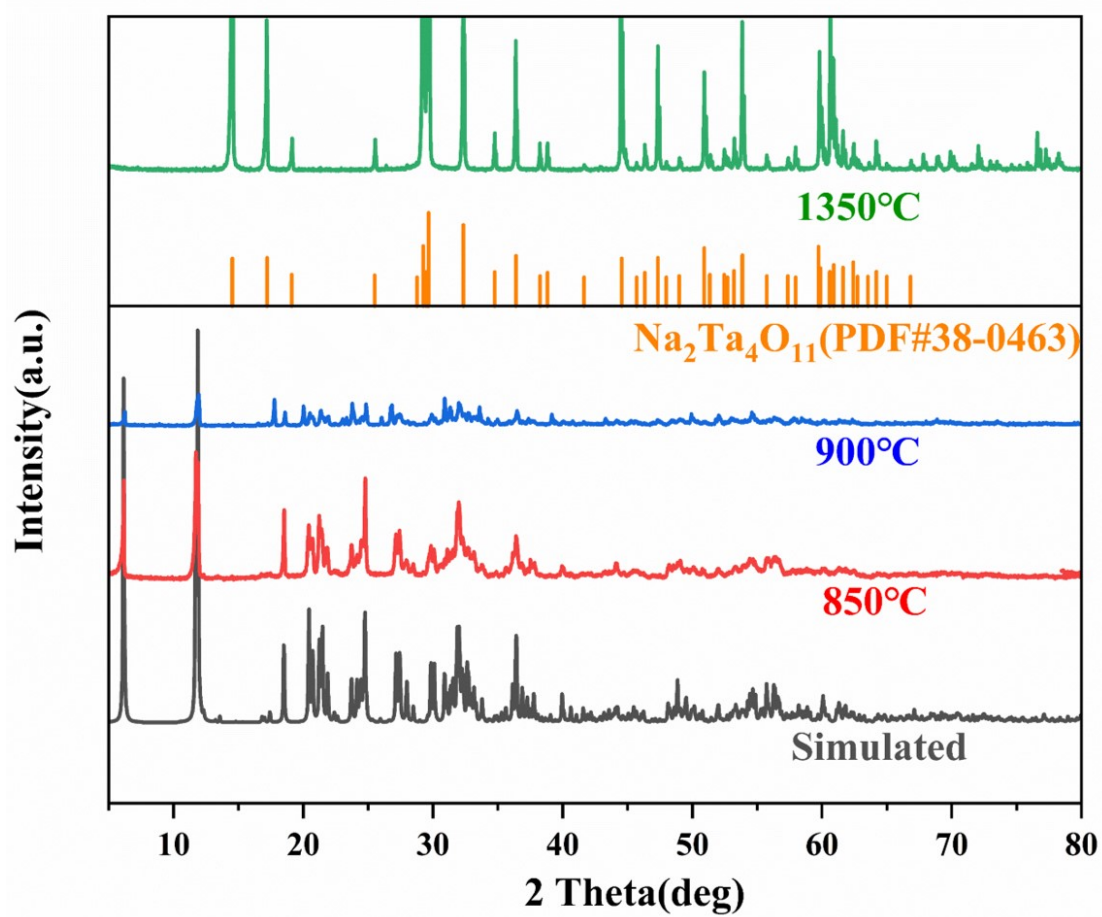

Figure S4. Crystal structure of BBO and NTPO.

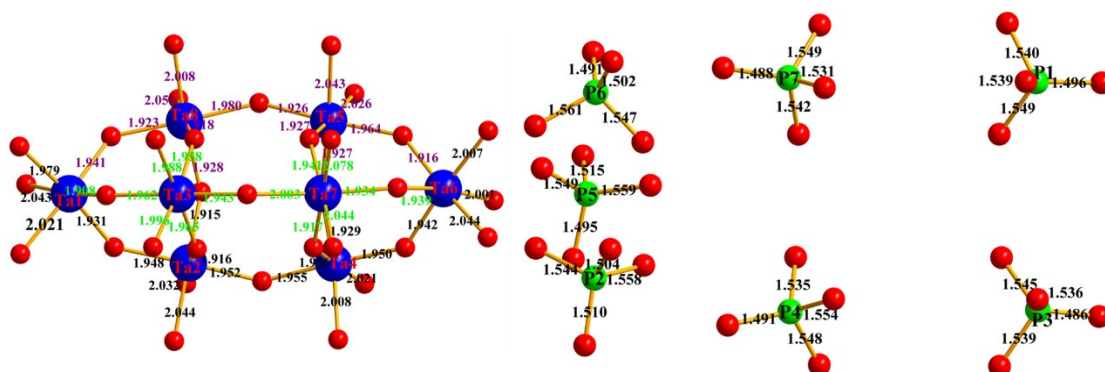

(a) the  $(\text{Ta}_8\text{O}_{33})$  bi-capped triangular prism and  $\text{PO}_4$  tetrahedrons with bond lengths (Å) labeled.

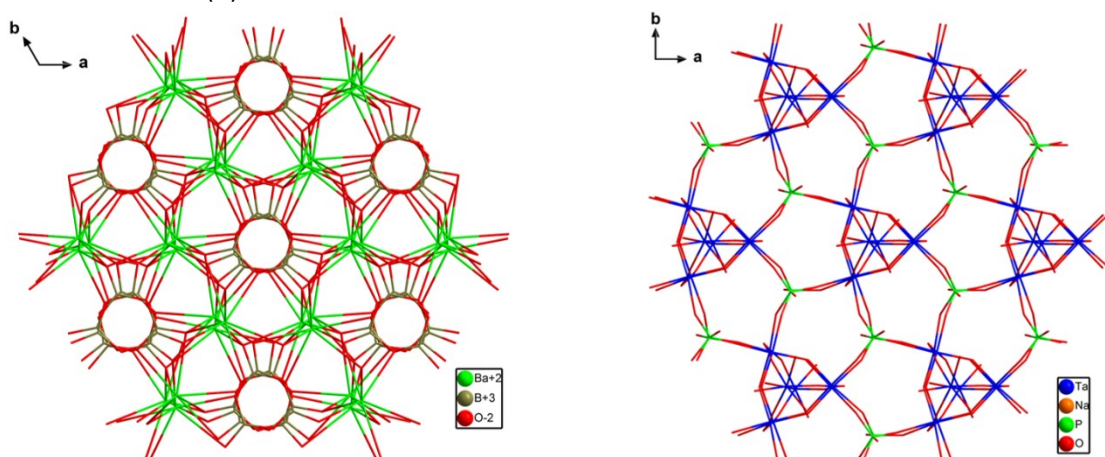

(b)  $ab$  plane structure of crystal BBO and NTPO.

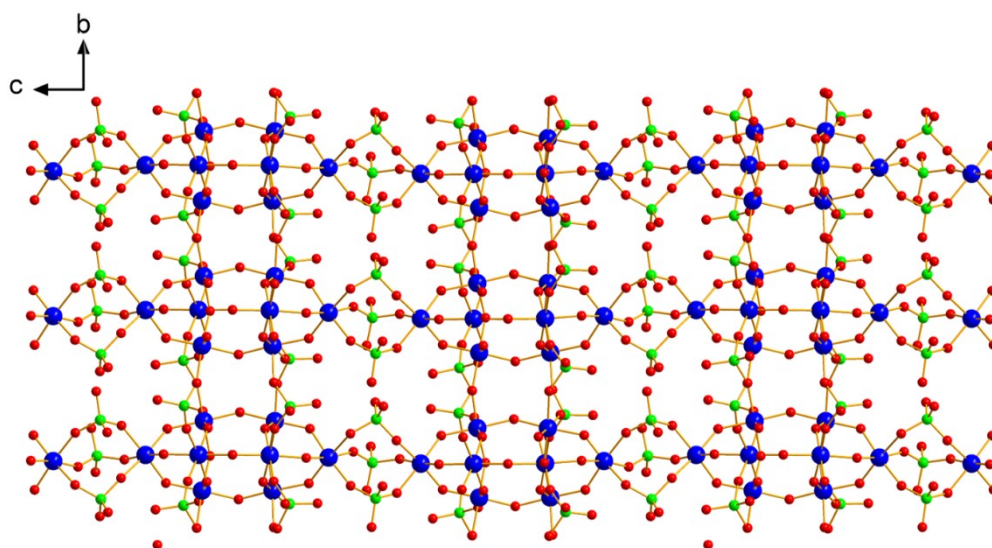

(c) crystal structure of  $ab$  plane.

**Figure S5.** Calculated electronic band structure (a) and density of states (DOS) (b) of  $\text{Na}_{11}\text{Ta}_8\text{P}_7\text{O}_{43}$ .

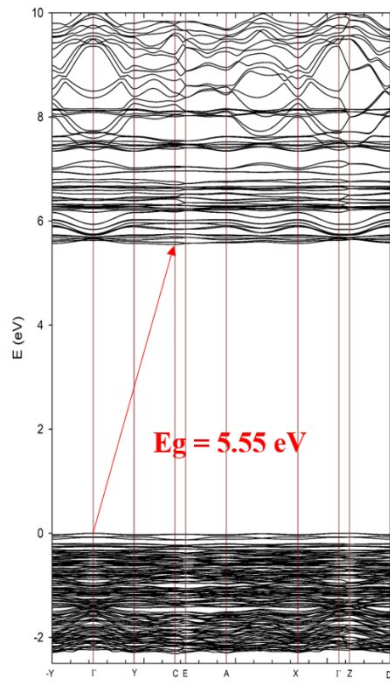

(a)

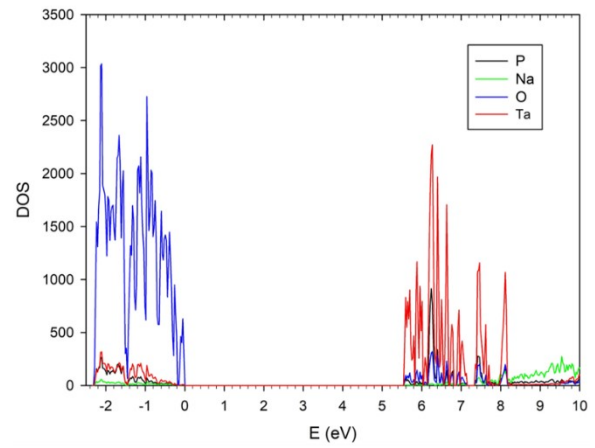

(b)

**Table S1.** Fractional atomic coordinates and equivalent isotropic displacement parameters ( $\text{\AA}^2$ ) for the compound  $\text{Na}_{11}\text{Ta}_8\text{P}_7\text{O}_{43}$ . Ueq is defined as one-third of the trace of the orthogonalised  $U_{ij}$  tensor.

| Atom | Wyck. | x          | y           | z           | Ueq         | BVS    |
|------|-------|------------|-------------|-------------|-------------|--------|
| Ta1  | 4a    | 0.66017(6) | 0.98509(3)  | 0.64952(2)  | 0.0073(1)   | 5.0999 |
| Ta2  | 4a    | 0.55559(5) | 0.86818(3)  | 0.54351(2)  | 0.00553(10) | 5.1124 |
| Ta3  | 4a    | 0.42555(6) | 0.48460(3)  | 0.55324(2)  | 0.00589(11) | 5.0689 |
| Ta4  | 4a    | 0.07281(5) | 0.36817(3)  | 0.41444(2)  | 0.00575(10) | 5.0656 |
| Ta5  | 4a    | 0.07801(5) | 0.60797(3)  | 0.41875(2)  | 0.00574(10) | 5.0934 |
| Ta6  | 4a    | 0.21058(6) | 0.49395(3)  | 0.31696(2)  | 0.00684(10) | 5.0574 |
| Ta7  | 4a    | 0.44215(5) | 0.48581(3)  | 0.42388(2)  | 0.00595(11) | 4.9348 |
| Ta8  | 4a    | 0.05839(5) | 0.60781(3)  | 0.54694(2)  | 0.00598(10) | 5.1083 |
| Na1  | 4a    | 0.0846(8)  | 0.0295(4)   | 0.2911(2)   | 0.0284(14)  | 0.9788 |
| Na2  | 4a    | 0.0301(8)  | 0.2792(4)   | 0.2989(2)   | 0.0295(14)  | 0.9484 |
| Na3  | 4a    | 0.3922(11) | 0.2797(4)   | 0.4862(3)   | 0.054(2)    | 0.8970 |
| Na4  | 4a    | 0.7825(8)  | 0.4859(5)   | 0.4778(3)   | 0.0383(17)  | 1.0102 |
| Na5  | 4a    | 0.9368(8)  | 0.6671(4)   | 0.6788(2)   | 0.0311(15)  | 0.9282 |
| Na6  | 4a    | 0.1979(7)  | 0.8281(3)   | 0.7004(2)   | 0.0213(12)  | 1.1868 |
| Na7  | 4a    | 0.0603(7)  | 0.0405(4)   | 0.6734(2)   | 0.0280(14)  | 0.8749 |
| Na8  | 4a    | 0.0235(7)  | 0.2754(3)   | 0.6604(2)   | 0.0257(13)  | 1.0553 |
| Na9  | 4a    | 0.3824(9)  | 0.6986(4)   | 0.4867(3)   | 0.0417(18)  | 0.9214 |
| Na10 | 4a    | 0.9338(8)  | 0.6907(4)   | 0.3112(2)   | 0.0334(16)  | 0.8943 |
| Na11 | 4a    | 0.1683(7)  | 0.8258(4)   | 0.2649(2)   | 0.0248(13)  | 1.1255 |
| P1   | 4a    | 0.1876(4)  | 0.15375(18) | 0.38806(11) | 0.0066(6)   | 4.9840 |
| P2   | 4a    | 0.3418(4)  | 0.63528(19) | 0.23154(11) | 0.0085(6)   | 5.0201 |
| P3   | 4a    | 0.1838(4)  | 0.81812(18) | 0.38680(11) | 0.0072(6)   | 5.0392 |
| P4   | 4a    | 0.1938(4)  | 0.81535(18) | 0.57931(11) | 0.0069(6)   | 4.9782 |
| P5   | 4a    | 0.4035(4)  | 0.98846(18) | 0.73743(12) | 0.0095(6)   | 5.0105 |
| P6   | 4a    | 0.8080(4)  | 0.13795(19) | 0.73038(12) | 0.0094(6)   | 5.0768 |
| P7   | 4a    | 0.6835(4)  | 0.65923(18) | 0.58052(11) | 0.0068(6)   | 5.0251 |
| O1   | 4a    | 0.2132(11) | 0.6165(5)   | 0.1930(3)   | 0.0139(19)  | 2.1220 |
| O2   | 4a    | 0.4933(11) | 0.5930(6)   | 0.2190(3)   | 0.020(2)    | 1.9815 |
| O3   | 4a    | 0.3505(12) | 0.7341(5)   | 0.2389(3)   | 0.018(2)    | 1.9594 |
| O4   | 4a    | 0.2904(12) | 0.5914(6)   | 0.2769(3)   | 0.020(2)    | 2.1286 |
| O5   | 4a    | 0.1130(11) | 0.8082(6)   | 0.3391(3)   | 0.017(2)    | 1.8511 |
| O6   | 4a    | 0.361(1)   | 0.8332(5)   | 0.3870(3)   | 0.0141(18)  | 2.0654 |
| O7   | 4a    | 0.1147(10) | 0.8948(5)   | 0.4149(3)   | 0.0141(19)  | 2.0642 |
| O8   | 4a    | 0.1589(11) | 0.7350(5)   | 0.4165(3)   | 0.0139(19)  | 2.0762 |
| O9   | 4a    | 0.1118(11) | 0.5831(5)   | 0.3529(3)   | 0.0129(18)  | 1.9443 |
| O10  | 4a    | 0.3964(11) | 0.4953(5)   | 0.3577(3)   | 0.0121(19)  | 1.9313 |
| O11  | 4a    | 0.1279(10) | 0.3944(5)   | 0.3508(3)   | 0.0070(16)  | 1.9494 |

---

|     |    |            |           |           |            |        |
|-----|----|------------|-----------|-----------|------------|--------|
| O12 | 4a | 0.0065(11) | 0.4880(5) | 0.4256(3) | 0.0075(17) | 2.0174 |
| O13 | 4a | 0.0186(10) | 0.6383(5) | 0.4806(3) | 0.0118(18) | 1.9658 |
| O14 | 4a | 0.1284(11) | 0.2394(5) | 0.4104(3) | 0.018(2)   | 2.0923 |
| O15 | 4a | 0.3663(11) | 0.1537(6) | 0.3959(3) | 0.018(2)   | 2.1370 |
| O16 | 4a | 0.122(1)   | 0.0764(5) | 0.4167(3) | 0.0122(18) | 2.0235 |
| O17 | 4a | 0.1453(13) | 0.1519(6) | 0.3371(3) | 0.026(2)   | 1.8680 |
| O18 | 4a | 0.2906(10) | 0.3945(5) | 0.4322(3) | 0.0093(18) | 1.9938 |
| O19 | 4a | 0.5088(11) | 0.4843(5) | 0.4914(3) | 0.0105(18) | 1.8774 |
| O20 | 4a | 0.2912(10) | 0.5780(5) | 0.4358(3) | 0.0099(17) | 2.0081 |
| O21 | 4a | 0.5809(11) | 0.5763(5) | 0.5728(3) | 0.0147(18) | 2.1086 |
| O22 | 4a | 0.8297(11) | 0.6448(6) | 0.5526(3) | 0.0163(19) | 2.0655 |
| O23 | 4a | 0.7119(12) | 0.6737(6) | 0.6313(3) | 0.023(2)   | 1.8851 |
| O24 | 4a | 0.5948(10) | 0.7368(5) | 0.5562(3) | 0.0138(19) | 2.0689 |
| O25 | 4a | 0.7727(10) | 0.8921(5) | 0.5361(3) | 0.0098(17) | 1.9763 |
| O26 | 4a | 0.5205(10) | 0.8377(5) | 0.4780(3) | 0.0103(18) | 1.9516 |
| O27 | 4a | 0.5667(10) | 0.8950(5) | 0.6098(3) | 0.0066(16) | 1.9983 |
| O28 | 4a | 0.8490(11) | 0.9826(5) | 0.6166(3) | 0.0100(18) | 1.9552 |
| O29 | 4a | 0.4665(12) | 0.0011(5) | 0.6878(3) | 0.017(2)   | 2.0735 |
| O30 | 4a | 0.7734(13) | 0.0648(6) | 0.6938(3) | 0.022(2)   | 2.2208 |
| O31 | 4a | 0.9566(12) | 0.1829(7) | 0.7176(3) | 0.026(2)   | 1.9990 |
| O32 | 4a | 0.6689(12) | 0.1969(6) | 0.7323(4) | 0.024(2)   | 2.0355 |
| O33 | 4a | 0.8401(11) | 0.0884(5) | 0.7774(3) | 0.0136(18) | 2.0510 |
| O34 | 4a | 0.5298(11) | 0.0261(6) | 0.7720(3) | 0.0158(19) | 2.1026 |
| O35 | 4a | 0.2575(12) | 0.0444(6) | 0.7403(3) | 0.022(2)   | 1.9356 |
| O36 | 4a | 0.3770(14) | 0.8928(6) | 0.7477(4) | 0.034(3)   | 1.9424 |
| O37 | 4a | 0.2512(13) | 0.7954(6) | 0.6278(3) | 0.024(2)   | 1.8229 |
| O38 | 4a | 0.0835(11) | 0.8952(5) | 0.5750(3) | 0.0128(18) | 2.0774 |
| O39 | 4a | 0.3266(10) | 0.8340(5) | 0.5454(3) | 0.0149(19) | 2.0749 |
| O40 | 4a | 0.1026(11) | 0.7371(5) | 0.5566(3) | 0.0151(18) | 2.0995 |
| O41 | 4a | 0.0733(10) | 0.5818(5) | 0.6124(3) | 0.0089(16) | 1.9380 |
| O42 | 4a | 0.994(1)   | 0.4884(5) | 0.5325(3) | 0.0085(17) | 2.0889 |
| O43 | 4a | 0.2726(9)  | 0.5776(5) | 0.5383(3) | 0.0075(16) | 1.9674 |

---



**Table S2.** Anisotropic displacement parameters ( $\text{\AA}^2$ ) for the compound  $\text{Na}_{11}\text{Ta}_8\text{P}_7\text{O}_{43}$ .

| Atom | $U_{11}$   | $U_{22}$   | $U_{33}$   | $U_{12}$     | $U_{13}$    | $U_{23}$     |
|------|------------|------------|------------|--------------|-------------|--------------|
| Ta1  | 0.0088(3)  | 0.0085(2)  | 0.0047(2)  | 0.00079(19)  | 0.00067(18) | -0.00015(18) |
| Ta2  | 0.0058(3)  | 0.0046(2)  | 0.0062(2)  | -0.00068(19) | 0.00036(18) | 0.00010(18)  |
| Ta3  | 0.0045(3)  | 0.0060(2)  | 0.0072(3)  | 0.00013(18)  | 0.00072(19) | 0.00001(17)  |
| Ta4  | 0.0060(3)  | 0.0046(2)  | 0.0067(3)  | -0.00057(19) | 0.00135(19) | -0.00012(17) |
| Ta5  | 0.0055(3)  | 0.0046(2)  | 0.0072(3)  | 0.00075(19)  | 0.00120(19) | -0.00026(17) |
| Ta6  | 0.0073(2)  | 0.0079(2)  | 0.0053(2)  | -0.00029(18) | 0.00088(18) | 0.00018(17)  |
| Ta7  | 0.0046(3)  | 0.0065(2)  | 0.0067(3)  | -0.00010(18) | 0.0004(2)   | 0.00030(17)  |
| Ta8  | 0.0060(3)  | 0.0048(2)  | 0.0072(3)  | 0.00100(19)  | 0.00123(19) | 0.00026(18)  |
| Na1  | 0.022(3)   | 0.040(4)   | 0.023(3)   | 0.005(3)     | -0.001(3)   | -0.011(3)    |
| Na2  | 0.032(4)   | 0.031(3)   | 0.026(3)   | -0.010(3)    | -0.006(3)   | -0.001(2)    |
| Na3  | 0.096(7)   | 0.025(3)   | 0.040(4)   | 0.037(4)     | -0.005(4)   | -0.002(3)    |
| Na4  | 0.010(3)   | 0.075(5)   | 0.030(4)   | -0.001(3)    | -0.007(3)   | 0.001(3)     |
| Na5  | 0.038(4)   | 0.026(3)   | 0.028(4)   | 0.009(3)     | -0.011(3)   | -0.007(2)    |
| Na6  | 0.023(3)   | 0.020(3)   | 0.021(3)   | 0.002(2)     | 0.000(3)    | -0.006(2)    |
| Na7  | 0.022(3)   | 0.039(3)   | 0.023(3)   | -0.001(3)    | 0.000(3)    | 0.004(2)     |
| Na8  | 0.026(3)   | 0.024(3)   | 0.026(3)   | -0.003(2)    | -0.001(3)   | 0.013(2)     |
| Na9  | 0.059(5)   | 0.026(3)   | 0.040(4)   | -0.025(3)    | -0.009(4)   | 0.001(3)     |
| Na10 | 0.041(4)   | 0.036(4)   | 0.023(4)   | -0.006(3)    | -0.003(3)   | -0.006(3)    |
| Na11 | 0.024(3)   | 0.028(3)   | 0.023(3)   | 0.001(2)     | 0.002(3)    | 0.003(2)     |
| P1   | 0.0034(15) | 0.0056(13) | 0.0108(16) | 0.0017(10)   | 0.0012(12)  | 0.0006(10)   |
| P2   | 0.0098(17) | 0.0088(14) | 0.0069(15) | -0.0013(10)  | -0.0004(13) | 0.0009(10)   |
| P3   | 0.0073(16) | 0.0072(14) | 0.0071(16) | 0.0014(10)   | -0.0004(12) | -0.0004(10)  |
| P4   | 0.0044(15) | 0.0043(13) | 0.0119(16) | 0.0012(10)   | -0.0011(12) | -0.001(1)    |
| P5   | 0.0086(17) | 0.0112(14) | 0.0084(16) | -0.0015(11)  | -0.0008(13) | 0.0017(10)   |
| P6   | 0.0105(17) | 0.0071(14) | 0.0105(16) | 0.0006(10)   | 0.0009(12)  | -0.0006(10)  |
| P7   | 0.0061(16) | 0.0060(13) | 0.0082(16) | -0.0004(10)  | 0.0002(12)  | 0.0005(10)   |
| O1   | 0.015(5)   | 0.013(4)   | 0.014(5)   | 0.000(3)     | -0.001(4)   | 0.002(3)     |
| O2   | 0.006(5)   | 0.032(5)   | 0.021(5)   | 0.002(4)     | 0.001(4)    | -0.003(4)    |
| O3   | 0.023(6)   | 0.014(4)   | 0.018(5)   | -0.006(4)    | -0.003(4)   | 0.005(3)     |
| O4   | 0.030(6)   | 0.018(5)   | 0.011(5)   | -0.005(4)    | 0.005(4)    | 0.007(3)     |
| O5   | 0.017(5)   | 0.024(5)   | 0.010(5)   | 0.001(4)     | -0.008(4)   | -0.002(3)    |
| O6   | 0.003(4)   | 0.019(4)   | 0.021(5)   | -0.002(3)    | 0.001(4)    | -0.001(3)    |
| O7   | 0.010(5)   | 0.007(4)   | 0.025(5)   | 0.005(3)     | 0.002(4)    | -0.006(3)    |
| O8   | 0.018(5)   | 0.005(4)   | 0.018(5)   | -0.004(3)    | 0.005(4)    | -0.002(3)    |
| O9   | 0.019(5)   | 0.015(4)   | 0.005(4)   | 0.000(3)     | 0.002(4)    | -0.001(3)    |
| O10  | 0.013(5)   | 0.007(4)   | 0.017(5)   | -0.002(3)    | -0.002(4)   | 0.001(3)     |
| O11  | 0.0069(19) | 0.0072(19) | 0.0069(19) | -0.0006(12)  | 0.0010(12)  | -0.0004(12)  |
| O12  | 0.012(5)   | 0.005(4)   | 0.005(4)   | -0.003(3)    | 0.001(3)    | -0.002(3)    |
| O13  | 0.012(5)   | 0.012(4)   | 0.012(5)   | 0.007(3)     | -0.001(4)   | 0.000(3)     |
| O14  | 0.018(2)   | 0.017(2)   | 0.019(2)   | 0.0000(13)   | 0.0018(13)  | -0.0004(13)  |
| O15  | 0.007(5)   | 0.021(5)   | 0.026(6)   | 0.005(3)     | 0.004(4)    | 0.014(4)     |

|     |          |            |          |             |            |             |
|-----|----------|------------|----------|-------------|------------|-------------|
| O16 | 0.009(5) | 0.014(4)   | 0.014(5) | -0.008(3)   | -0.003(4)  | 0.004(3)    |
| O17 | 0.038(7) | 0.030(5)   | 0.010(5) | -0.006(4)   | -0.009(5)  | 0.002(4)    |
| O18 | 0.006(4) | 0.005(4)   | 0.017(5) | -0.003(3)   | -0.002(4)  | 0.000(3)    |
| O19 | 0.009(5) | 0.014(4)   | 0.008(5) | 0.002(3)    | 0.002(4)   | 0.006(3)    |
| O20 | 0.013(5) | 0.007(4)   | 0.010(4) | 0.000(3)    | -0.002(4)  | -0.004(3)   |
| O21 | 0.014(2) | 0.014(2)   | 0.016(2) | -0.0008(12) | 0.0004(13) | 0.0004(12)  |
| O22 | 0.010(5) | 0.022(5)   | 0.017(5) | 0.002(3)    | 0.005(4)   | -0.001(3)   |
| O23 | 0.022(6) | 0.034(6)   | 0.013(5) | 0.009(4)    | -0.006(4)  | -0.005(4)   |
| O24 | 0.009(5) | 0.006(4)   | 0.026(5) | 0.002(3)    | -0.002(4)  | 0.004(3)    |
| O25 | 0.003(4) | 0.015(4)   | 0.012(5) | -0.004(3)   | -0.001(3)  | -0.004(3)   |
| O26 | 0.013(5) | 0.009(4)   | 0.009(4) | 0.000(3)    | 0.001(4)   | 0.000(3)    |
| O27 | 0.009(4) | 0.009(4)   | 0.002(4) | 0.001(3)    | 0.002(3)   | -0.001(3)   |
| O28 | 0.020(5) | 0.004(4)   | 0.006(4) | -0.003(3)   | 0.001(4)   | 0.001(3)    |
| O29 | 0.016(5) | 0.022(5)   | 0.013(5) | 0.001(3)    | 0.002(4)   | 0.004(3)    |
| O30 | 0.039(7) | 0.017(5)   | 0.010(5) | -0.003(4)   | -0.004(4)  | -0.005(3)   |
| O31 | 0.018(6) | 0.041(6)   | 0.019(6) | -0.016(4)   | -0.001(4)  | 0.017(4)    |
| O32 | 0.020(6) | 0.018(5)   | 0.036(6) | 0.009(4)    | 0.016(5)   | 0.001(4)    |
| O33 | 0.010(5) | 0.025(5)   | 0.006(4) | -0.006(3)   | -0.001(4)  | 0.006(3)    |
| O34 | 0.016(5) | 0.023(5)   | 0.008(5) | -0.002(3)   | -0.001(4)  | 0.001(3)    |
| O35 | 0.015(5) | 0.027(5)   | 0.022(6) | 0.007(4)    | 0.001(4)   | -0.003(4)   |
| O36 | 0.041(8) | 0.022(5)   | 0.038(7) | -0.012(5)   | -0.009(6)  | 0.015(4)    |
| O37 | 0.034(6) | 0.021(5)   | 0.018(6) | 0.007(4)    | -0.006(5)  | 0.004(4)    |
| O38 | 0.014(5) | 0.009(4)   | 0.016(5) | 0.004(3)    | 0.002(4)   | -0.002(3)   |
| O39 | 0.005(5) | 0.020(5)   | 0.020(5) | 0.001(3)    | 0.002(4)   | -0.001(3)   |
| O40 | 0.015(2) | 0.014(2)   | 0.016(2) | -0.0013(12) | 0.0008(13) | -0.0004(12) |
| O41 | 0.009(2) | 0.0088(19) | 0.008(2) | 0.0000(12)  | 0.0003(13) | -0.0009(12) |
| O42 | 0.006(5) | 0.010(4)   | 0.010(5) | 0.002(3)    | 0.000(4)   | 0.003(3)    |
| O43 | 0.006(4) | 0.006(4)   | 0.010(4) | 0.001(3)    | 0.001(3)   | -0.001(3)   |

**Table S3.** Selected bond lengths (Å) for the compound Na<sub>11</sub>Ta<sub>8</sub>P<sub>7</sub>O<sub>43</sub>.

|                       |           |                       |           |
|-----------------------|-----------|-----------------------|-----------|
| Ta1— O1 <sup>3</sup>  | 2.022(8)  | P5—O35                | 1.515(10) |
| Ta1— O27              | 1.930(8)  | P5—O36                | 1.495(9)  |
| Ta1— O28              | 1.909(10) | P6—O30                | 1.547(9)  |
| Ta1— O29              | 2.043(10) | P6—O31                | 1.502(10) |
| Ta1— O30              | 1.979(9)  | P6—O32                | 1.491(10) |
| Ta1— O41 <sup>4</sup> | 1.942(8)  | P6—O33                | 1.561(9)  |
| Ta2— O24              | 2.045(8)  | P7—O21                | 1.542(9)  |
| Ta2— O25              | 1.916(8)  | P7—O22                | 1.531(10) |
| Ta2— O26              | 1.952(9)  | P7—O23                | 1.487(10) |
| Ta2— O27              | 1.949(8)  | P7—O24                | 1.549(8)  |
| Ta2— O39              | 2.033(9)  | Na1—O2 <sup>2</sup>   | 2.388(12) |
| Ta2— O42 <sup>4</sup> | 1.915(7)  | Na1—O4 <sup>2</sup>   | 2.705(12) |
| Ta3— O19              | 1.942(9)  | Na1—O10 <sup>2</sup>  | 2.606(12) |
| Ta3— O21              | 1.988(9)  | Na1—O17               | 2.321(11) |
| Ta3— O25 <sup>2</sup> | 1.965(8)  | Na1—O33 <sup>8</sup>  | 2.767(11) |
| Ta3— O28 <sup>2</sup> | 1.961(9)  | Na1—O35 <sup>10</sup> | 2.399(12) |
| Ta3— O38 <sup>5</sup> | 1.996(8)  | Na2—O3 <sup>2</sup>   | 2.366(11) |
| Ta3— O43              | 1.958(7)  | Na2—O11               | 2.421(10) |
| Ta4— O6 <sup>2</sup>  | 2.021(8)  | Na2—O17               | 2.409(12) |
| Ta4— O11              | 1.950(8)  | Na2—O32 <sup>7</sup>  | 2.324(12) |
| Ta4— O12              | 1.929(7)  | Na3—O13 <sup>5</sup>  | 2.404(9)  |
| Ta4— O14              | 2.008(8)  | Na3—O22 <sup>2</sup>  | 2.859(12) |
| Ta4— O18              | 1.956(8)  | Na3—O25 <sup>2</sup>  | 2.474(11) |
| Ta4— O26 <sup>2</sup> | 1.955(9)  | Na3—O18               | 2.465(10) |
| Ta5— O8               | 2.043(8)  | Na3—O40 <sup>5</sup>  | 2.734(11) |
| Ta5— O9               | 1.966(9)  | Na4—O7 <sup>5</sup>   | 2.651(11) |
| Ta5— O12              | 1.927(7)  | Na4—O12 <sup>11</sup> | 2.485(12) |
| Ta5— O13              | 1.927(9)  | Na4—O16 <sup>4</sup>  | 2.581(11) |
| Ta5— O15 <sup>1</sup> | 2.027(9)  | Na4—O19               | 2.393(13) |
| Ta5— O20              | 1.927(8)  | Na4—O42 <sup>11</sup> | 2.352(11) |
| Ta6— O4               | 2.007(9)  | Na5—O3 <sup>3</sup>   | 2.423(11) |
| Ta6— O9               | 1.915(9)  | Na5—O23               | 2.321(12) |
| Ta6— O10              | 1.940(9)  | Na5—O29 <sup>5</sup>  | 2.534(10) |
| Ta6— O11              | 1.941(8)  | Na5—O32 <sup>5</sup>  | 2.507(13) |
| Ta6— O33 <sup>7</sup> | 2.044(8)  | Na5—O41 <sup>11</sup> | 2.620(11) |
| Ta6— O34 <sup>7</sup> | 2.001(9)  | Na6—O2 <sup>14</sup>  | 2.204(11) |
| Ta7— O7 <sup>5</sup>  | 2.043(8)  | Na6—O32 <sup>2</sup>  | 2.203(11) |
| Ta7— O10              | 1.933(9)  | Na6—O36               | 2.234(12) |
| Ta7— O16 <sup>4</sup> | 2.078(8)  | Na6—O37               | 2.212(12) |
| Ta7— O18              | 1.917(8)  | Na7—O2 <sup>3</sup>   | 2.486(11) |

|                       |           |                        |           |
|-----------------------|-----------|------------------------|-----------|
| Ta7— O19              | 2.004(9)  | Na7—O21 <sup>4</sup>   | 2.959(11) |
| Ta7— O20              | 1.942(8)  | Na7—O23 <sup>4</sup>   | 2.709(13) |
| Ta8— O13              | 1.978(9)  | Na7—O28                | 2.546(11) |
| Ta8— O22 <sup>6</sup> | 2.051(9)  | Na7—O30                | 2.577(13) |
| Ta8— O40              | 2.008(8)  | Na7—O31                | 2.669(13) |
| Ta8— O41              | 1.922(8)  | Na7—O35 <sup>11</sup>  | 2.510(12) |
| Ta8— O42              | 1.928(7)  | Na8—O1 <sup>15</sup>   | 2.463(10) |
| Ta8— O43              | 1.918(8)  | Na8—O23 <sup>4</sup>   | 2.404(12) |
| P1— O14               | 1.541(9)  | Na8—O27 <sup>4</sup>   | 2.358(9)  |
| P1— O15               | 1.539(10) | Na8—O31                | 2.252(11) |
| P1— O16               | 1.549(8)  | Na8—O37 <sup>4</sup>   | 2.499(12) |
| P1— O17               | 1.495(10) | Na9—O8                 | 2.781(12) |
| P2— O1                | 1.557(9)  | Na9—O20                | 2.446(10) |
| P2— O2                | 1.504(10) | Na9—O24                | 2.712(11) |
| P2— O3                | 1.511(9)  | Na9—O26                | 2.431(10) |
| P2— O4                | 1.545(9)  | Na9—O39                | 2.710(11) |
| P3— O5                | 1.485(9)  | Na9—O43                | 2.559(10) |
| P3— O6                | 1.535(9)  | Na10—O5                | 2.461(11) |
| P3— O7                | 1.546(8)  | Na10—O9                | 2.502(11) |
| P3— O8                | 1.539(9)  | Na10—O15 <sup>1</sup>  | 2.587(12) |
| P4— O37               | 1.491(10) | Na10—O17 <sup>1</sup>  | 2.676(14) |
| P4— O38               | 1.535(8)  | Na10—O36 <sup>7</sup>  | 2.259(12) |
| P4— O39               | 1.554(10) | Na11—O31 <sup>17</sup> | 2.229(11) |
| P4— O40               | 1.548(9)  | Na11—O35 <sup>18</sup> | 2.231(11) |
| P5— O29               | 1.559(11) | Na11—O3                | 2.238(11) |
| P5— O34               | 1.549(9)  | Na11—O5                | 2.223(11) |

<sup>1</sup>-1/2+X,1/2+Y,+Z; <sup>2</sup>-1/2+X,-1/2+Y,+Z; <sup>3</sup>1/2+X,3/2-Y,1/2+Z; <sup>4</sup>1/2+X,1/2+Y,+Z; <sup>5</sup>1/2+X,-1/2+Y,+Z; <sup>6</sup>-1+X,+Y,+Z; <sup>7</sup>-1/2+X,3/2-Y,-1/2+Z; <sup>8</sup>-1+X,1-Y,-1/2+Z; <sup>9</sup>+X,-1+Y,+Z; <sup>10</sup>+X,1-Y,-1/2+Z; <sup>11</sup>+X,+Y,+Z; <sup>12</sup>1+X,1-Y,1/2+Z; <sup>13</sup>+X,1-Y,1/2+Z; <sup>14</sup>-1/2+X,3/2-Y,1/2+Z; <sup>15</sup>1+X,2-Y,1/2+Z; <sup>16</sup>+X,1+Y,+Z; <sup>17</sup>-1+X,2-Y,-1/2+Z; <sup>18</sup>+X,2-Y,-1/2+Z; <sup>19</sup>1/2+X,3/2-Y,-1/2+Z; <sup>20</sup>+X,2-Y,1/2+Z.

**Appendix.** The original calculation results for Na<sub>11</sub>Ta<sub>8</sub>P<sub>7</sub>O<sub>43</sub>.

CRYSTAL CALCULATION

(INPUT ACCORDING TO THE INTERNATIONAL TABLES FOR X-RAY CRYSTALLOGRAPHY)

CRYSTAL FAMILY : MONOCLINIC

CRYSTAL CLASS (GROTH - 1921) : MONOCLINIC DOMATIC

SPACE GROUP (NONCENTROSYMMETRIC) : C C

LATTICE PARAMETERS (ANGSTROMS AND DEGREES) - CONVENTIONAL CELL

| A       | B        | C        | ALPHA    | BETA     | GAMMA    |
|---------|----------|----------|----------|----------|----------|
| 8.57100 | 15.11440 | 28.77120 | 90.00000 | 92.30400 | 90.00000 |

INSULATING STATE

TOP OF VALENCE BANDS - BAND 674; K 1; EIG -2.2357695E-01 AU

BOTTOM OF VIRTUAL BANDS - BAND 675; K 13; EIG -1.9634350E-02 AU

INDIRECT ENERGY BAND GAP: 5.5496 eV

BOTTOM OF VIRTUAL BANDS - BAND 675; K 1; EIG -1.6754668E-02 AU

TOTAL ATOMIC CHARGES:

|            |            |            |            |            |            |
|------------|------------|------------|------------|------------|------------|
| 10.4330342 | 10.4330342 | 10.4902562 | 10.4902562 | 10.4897239 | 10.4897239 |
| 10.4740400 | 10.4740400 | 10.4698870 | 10.4698870 | 10.4709497 | 10.4709497 |
| 10.4458154 | 10.4458154 | 10.4798867 | 10.4798867 | 13.6158961 | 13.6158961 |
| 13.4565222 | 13.4565222 | 13.6601651 | 13.6601651 | 13.6670453 | 13.6670453 |
| 13.4843968 | 13.4843968 | 13.4426413 | 13.4426413 | 13.6428962 | 13.6428962 |
| 10.2262282 | 10.2262282 | 10.2180444 | 10.2180444 | 10.2622165 | 10.2622165 |
| 10.2905420 | 10.2905420 | 10.2304782 | 10.2304782 | 10.1849337 | 10.1849337 |
| 10.2299345 | 10.2299345 | 10.2230198 | 10.2230198 | 10.2730637 | 10.2730637 |
| 10.2253413 | 10.2253413 | 10.1832399 | 10.1832399 | 9.0180385  | 9.0180385  |
| 8.9881214  | 8.9881214  | 8.8180853  | 8.8180853  | 8.8245894  | 8.8245894  |
| 9.0311041  | 9.0311041  | 8.9809902  | 8.9809902  | 8.7931456  | 8.7931456  |
| 8.9977935  | 8.9977935  | 8.8401193  | 8.8401193  | 9.0217200  | 9.0217200  |
| 8.8159025  | 8.8159025  | 8.7864413  | 8.7864413  | 8.7764007  | 8.7764007  |
| 8.9964762  | 8.9964762  | 8.9834296  | 8.9834296  | 8.8064730  | 8.8064730  |
| 8.8080132  | 8.8080132  | 8.9911823  | 8.9911823  | 8.9732522  | 8.9732522  |
| 8.8524855  | 8.8524855  | 8.7545477  | 8.7545477  | 9.0107909  | 9.0107909  |
| 8.7349299  | 8.7349299  | 8.9842335  | 8.9842335  | 8.9952826  | 8.9952826  |
| 8.8953392  | 8.8953392  | 9.0057446  | 9.0057446  | 8.8121554  | 8.8121554  |
| 8.8885177  | 8.8885177  | 8.9008971  | 8.9008971  | 8.8497164  | 8.8497164  |
| 8.9574969  | 8.9574969  | 8.7753670  | 8.7753670  | 8.9490968  | 8.9490968  |
| 8.9448509  | 8.9448509  | 8.9596634  | 8.9596634  | 8.8092194  | 8.8092194  |
| 8.8884978  | 8.8884978  | 8.8147944  | 8.8147944  | 8.9535964  | 8.9535964  |
| 8.8748391  | 8.8748391  | 8.9455848  | 8.9455848  | 8.9208762  | 8.9208762  |

TENSOR IN PRINCIPAL AXES SYSTEM

AA 2.835543E+00 BB 2.846642E+00 CC 3.043057E+00

REFRACTIVE INDICES

AA 1.683907E+00 BB 1.687200E+00 CC 1.744436E+00

OPTICALLY ANISOTROPIC - BIAXIAL CRYSTAL

ACUTE ANGLE BETWEEN OPTIC AXES (DEGREES)

2V= 27.66862

BIAXIAL POSITIVE: 2V ANGLE BISECTED BY THE LARGEST REFRACTIVE INDEX (CC)

FIRST HYPERPOLARIZABILITY (BETA) AND SECOND ELECTRIC SUSCEPTIBILITY (CHI(2))  
TENSORS (INDEPENDENT COMPONENTS)

| COMPONENT | BETA                      | CHI(2)      | d(MKS)      | d(cgs)      |
|-----------|---------------------------|-------------|-------------|-------------|
| XXX       | -1.2924E+03 (-1.2924E+03) | -6.4624E-01 | -6.2837E-01 | -1.4991E-02 |
| XXY       | -8.8801E-14 (-6.9421E-05) | -4.4402E-17 | -4.3174E-17 | -1.0300E-18 |
| XXZ       | -1.5157E+02 (-1.5157E+02) | -7.5788E-02 | -7.3692E-02 | -1.7581E-03 |
| XYX       | 1.5956E+03 (1.5956E+03)   | 7.9780E-01  | 7.7574E-01  | 1.8507E-02  |
| XYZ       | -2.0234E-14 (-5.2047E-04) | -1.0118E-17 | -9.8377E-18 | -2.3470E-19 |
| XZZ       | -1.7183E+02 (-1.7183E+02) | -8.5918E-02 | -8.3542E-02 | -1.9930E-03 |
| YYX       | 3.3086E-13 (-7.1099E-04)  | 1.6543E-16  | 1.6086E-16  | 3.8375E-18  |
| YYZ       | 1.9743E+02 (1.9743E+02)   | 9.8718E-02  | 9.5988E-02  | 2.2900E-03  |
| YZZ       | -6.8558E-15 (-1.5352E-03) | -3.4280E-18 | -3.3332E-18 | -7.9519E-20 |
| ZZX       | 5.7506E+01 (5.7506E+01)   | 2.8754E-02  | 2.7959E-02  | 6.6700E-04  |
